# Supplementary material for: Biomineralization-mimetic preparation of hybrid membranes with ultra-high loading of pristine metal–organic frameworks grown on silk nanofibers for hazard collection in water
Source: Royal Society of Chemistry journal article supplement (doi:10.1039/c7ta06924c), 2017-12-05
Supplement: c7ta06924c1.pdf [file c7ta06924c1.pdf]

1  
2  
3  
4  
5  
6  
7  
8  
9  
10  
11  
12  
13  
14  
15  
16  
17  
18  
19  
20  
21  
22

**Supporting Information**

**For**

**Biomimetic Preparation of Hybrid Membranes with Ultra-high  
Load of Pristine Metal-Organic Frameworks Grew on Silk Nanofibers for  
Hazardous Collection in Water**

*Zhishang Li<sup>a</sup>, Guanshan Zhou<sup>b</sup>, Huang Dai<sup>a</sup>, Mingying Yang<sup>\*b</sup>, Yingchun Fu<sup>\*a</sup>, Yibin  
Ying<sup>a</sup> and Yanbin Li<sup>a,c</sup>*

<sup>a</sup> College of Biosystems Engineering and Food Science, Zhejiang University,  
Hangzhou, 310058, China

<sup>b</sup> College of Animal Sciences, Zhejiang University, Hangzhou, 310058, China

<sup>c</sup> Department of Biological and Agricultural Engineering, University of Arkansas,  
Fayetteville, AR 72701, USA

\*Corresponding author: Yingchun Fu.

Tel./Fax: +86 571 88982534.

E-mail address: [ycfu@zju.edu.cn](mailto:ycfu@zju.edu.cn).

Mingying Yang

Tel./Fax: +86 571 88982219.

E-mail address: [yangm@zju.edu.cn](mailto:yangm@zju.edu.cn).

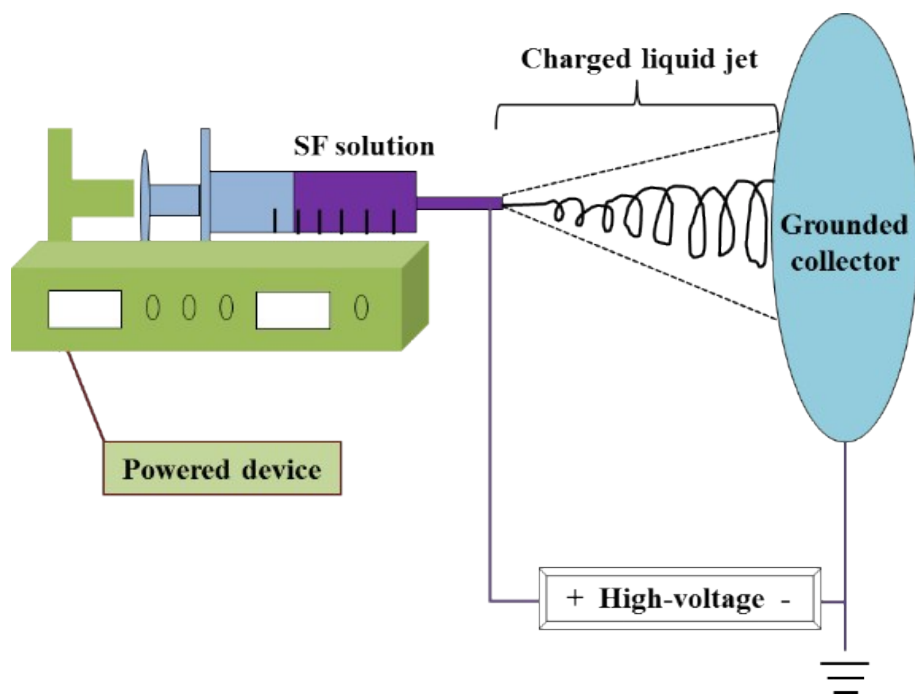

23

24 Scheme S1. Schematic diagram of electrospun setup.

25

26

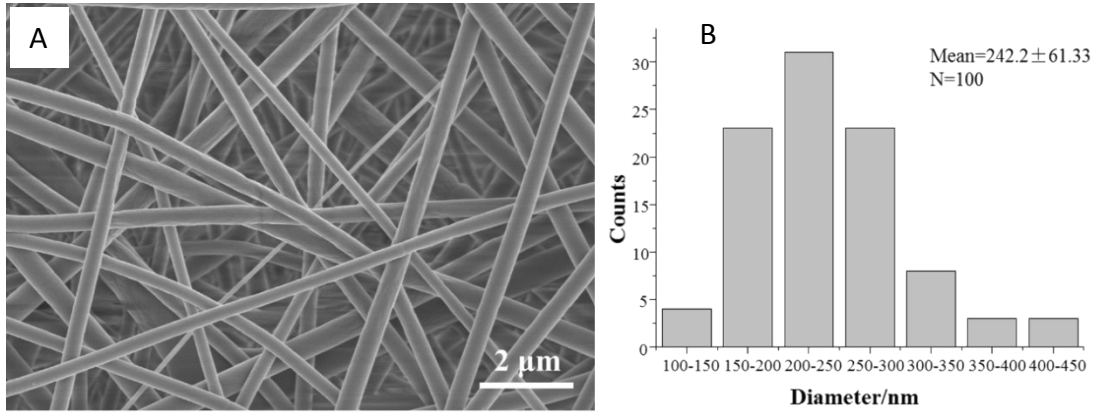

27

28 Figure S1. (A) SEM image of electrospun silk nanofibers. (B) Histograms of  
 29 electrospun silk nanofiber diameter distribution.

30

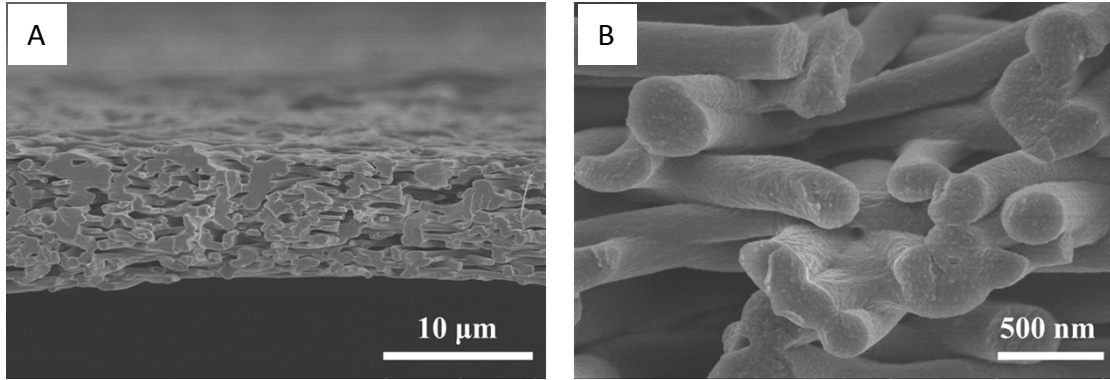

31

32 Figure S2. Cross section SEM image (A) of prepared electrospun silk nanofibers and  
33 a magnified part (B).

34

35

36

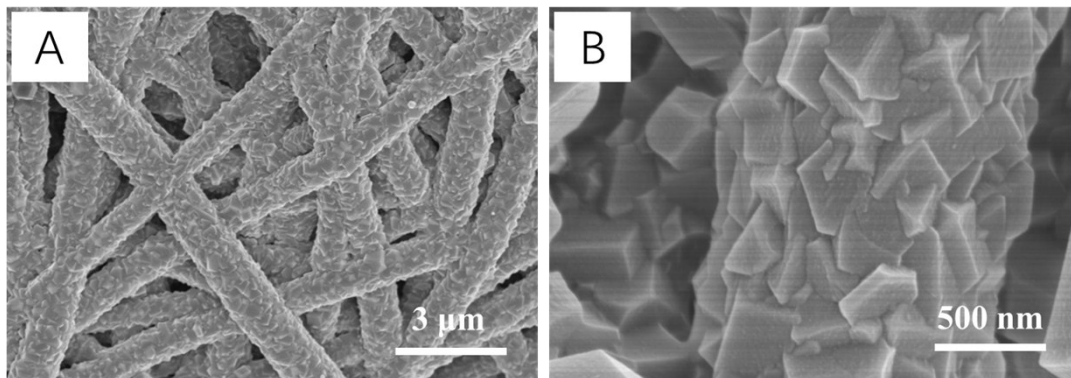

37  
38  
39

Figure S3. SEM images of ESF@ZIF-8 (1 h) membrane under different magnifications.

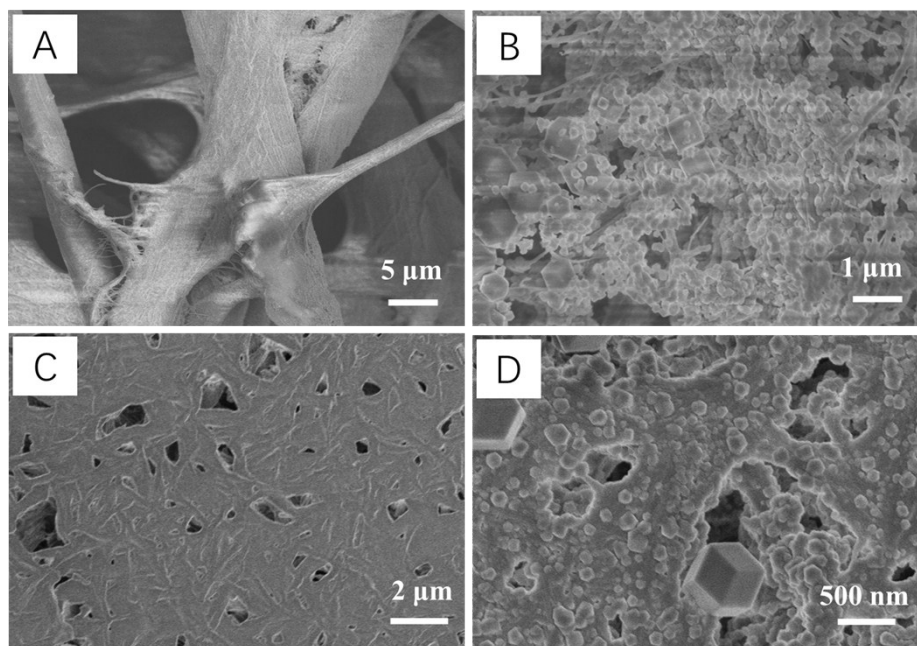

41

42 Figure S4. SEM images of commercial cellulose nitrate membrane before (A) and after ZIF-8  
43 coating (B), as well as polypropylene membrane before (C) and after (D) ZIF-8 coating.

44

45

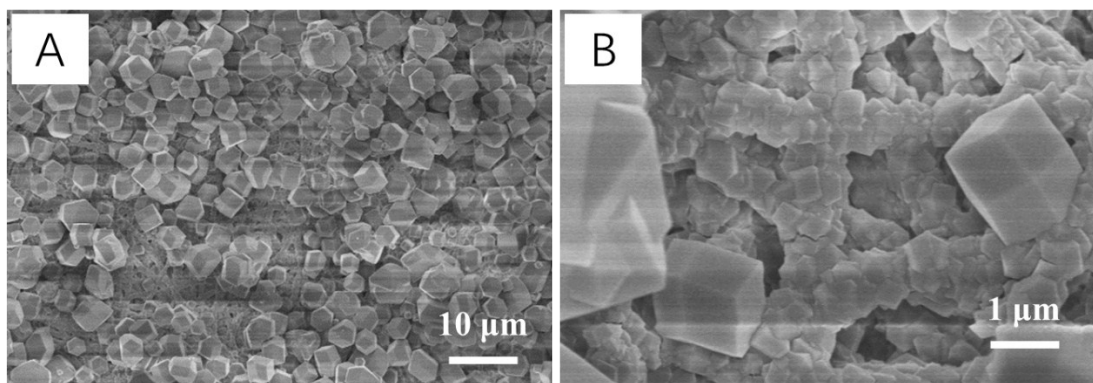

46

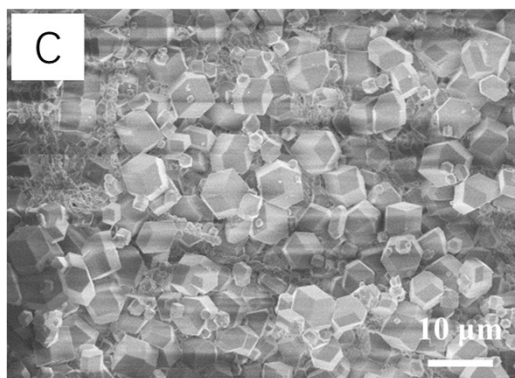

47

48

49 Figure S5. SEM image of ESF@ZIF-8 under different magnifications (A, B) and ESF@ZIF-67 (C)  
50 all prepared in 16-h reaction.

51

52

53

54

55

56

57

58

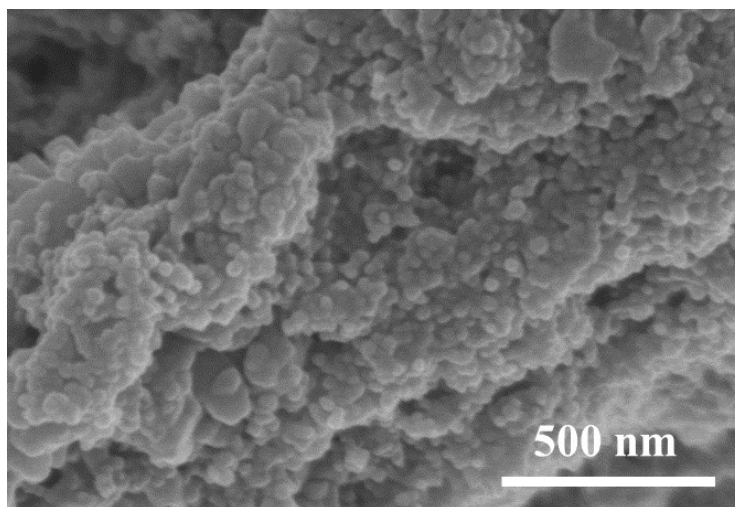

59

60

61 Figure S6. SEM image of the composite of regenerated silk protein and ZIF-8 prepared by directly  
62 mixing silk protein and precursors of ZIF-8.

63



64  
65

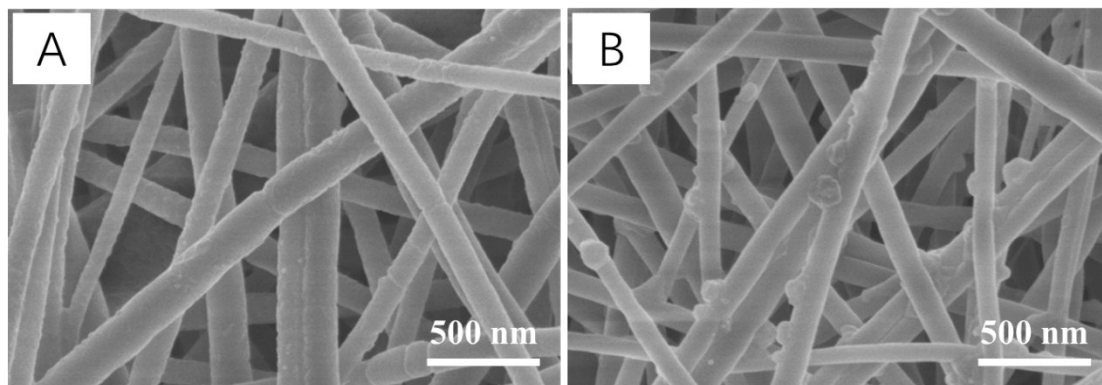

66  
67  
68

Figure S7. SEM image of PAN/ZIF-8 at 1 min (A) and 5 min (B).

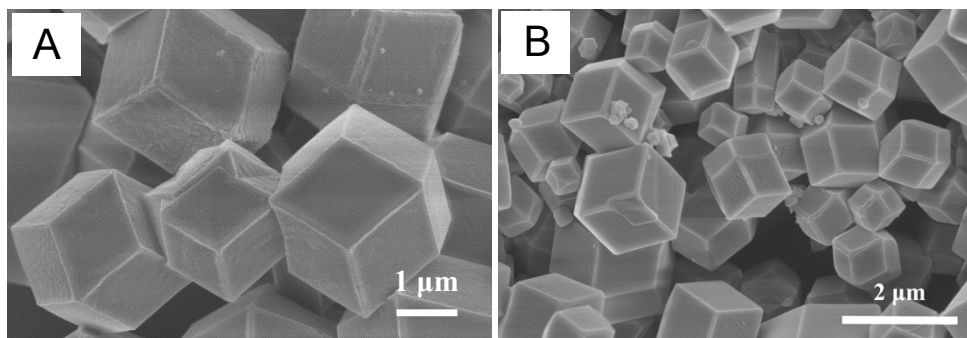

69 Figure S8. SEM image of micro ZIF-8 (A) and ZIF-67 (B) crystals formed in the solution after 1 h  
70 of incubation under the same condition as that for the preparation of ESF@MOFs hybrid  
71 membranes.  
72

73

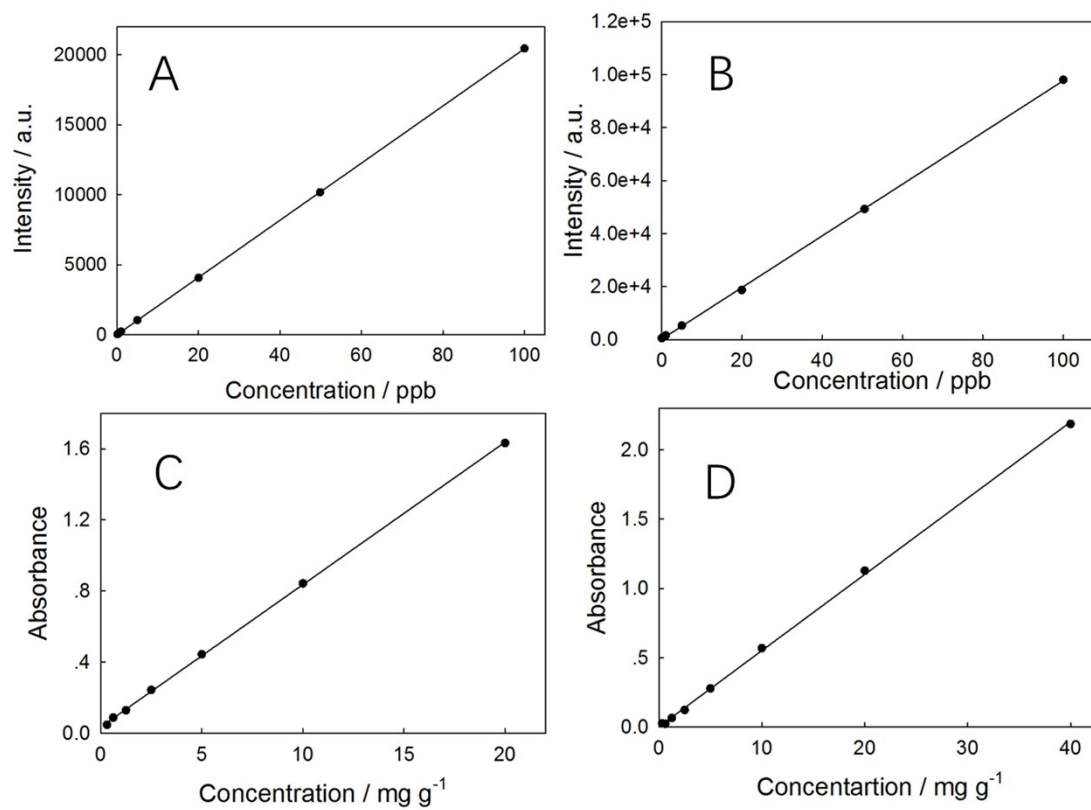

74

75

76 Figure S9. Calibration curves for As(V) (A) and Cr(VI) (B) detection obtained with ICP-OES, as  
77 well as for RB (C) and MG (D) with UV-vis spectroscopy.

78

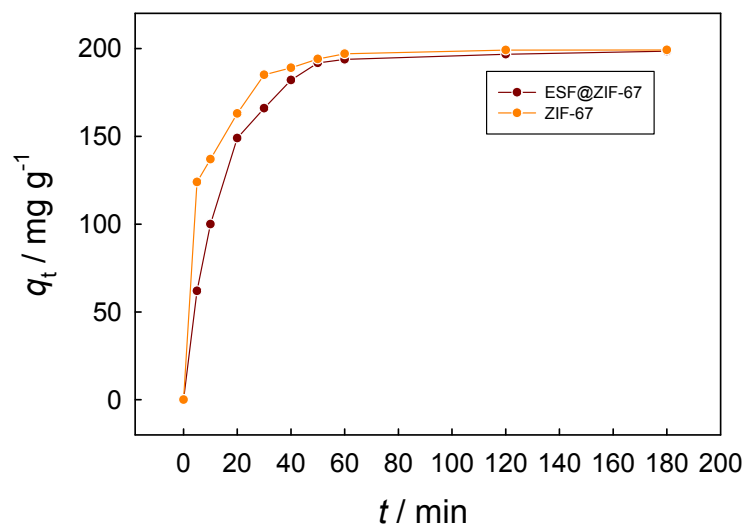

79

80 Figure S10. Time dependent adsorption of 200  $\text{mg L}^{-1}$  MG solution with ZIF-67  
81 crystals and ESF@ZIF-67 membranes.

82

83

84

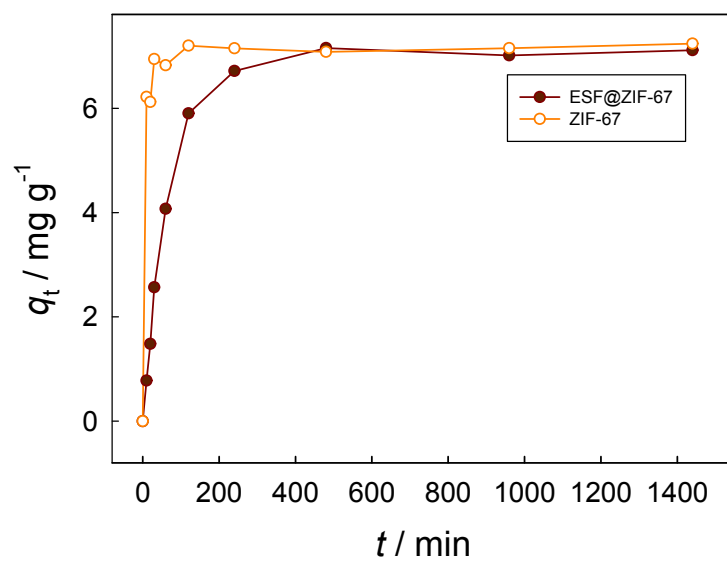

85

86 Figure S11. Time dependent adsorption of Cr(VI) using with ZIF-67 crystals and  
87 ESF@ZIF-67.

88

89

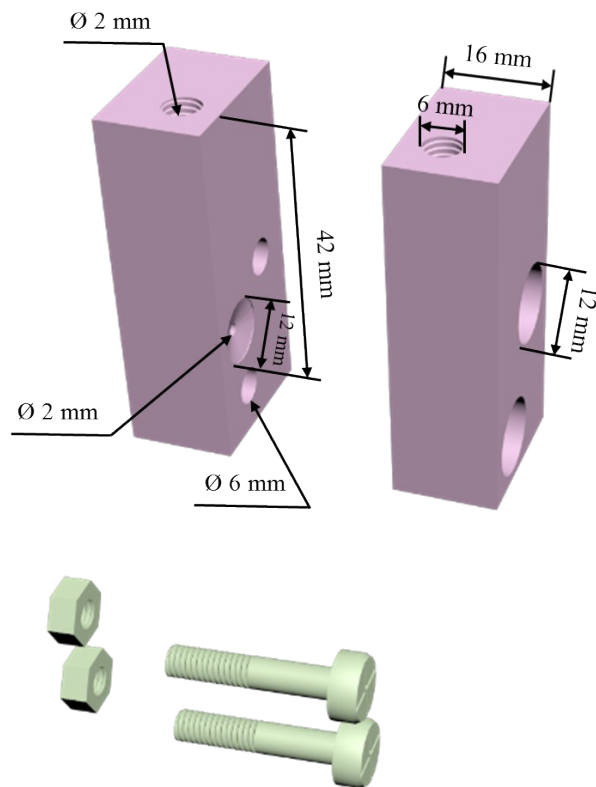

90

91

92 Figure S12. 3D model of the filter with sandwiched ESF@MOF hybrid membranes for effective  
93 water purification.

94

95

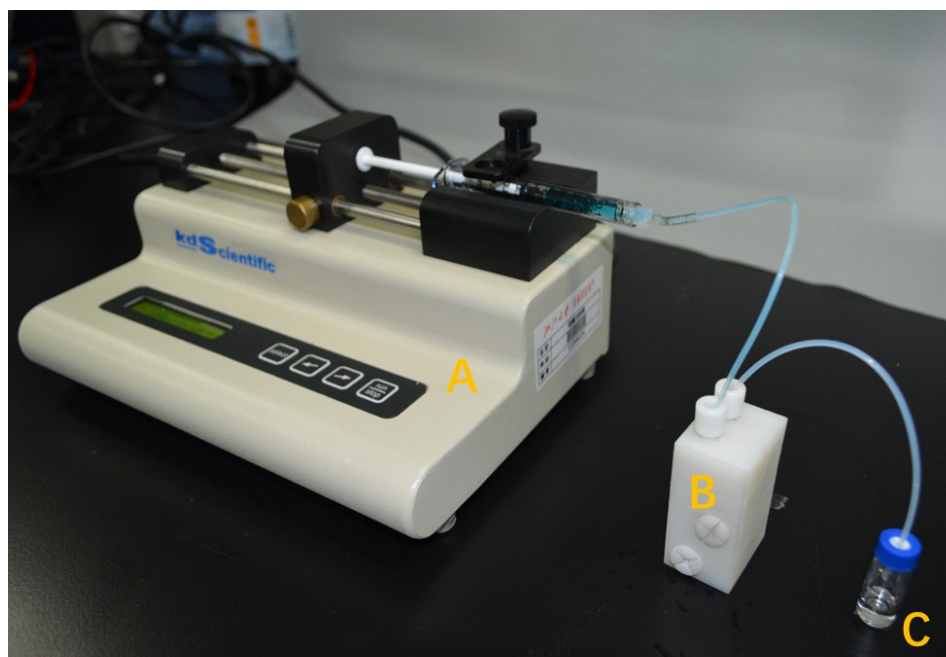

96

97 Figure S13. The ESF@ZIF-67 based filtration system for the purification of MG contaminated  
98 water. A: syringe pump, B: 3D-printed filter equipped with ESF@MOF membrane, C: vessel with  
99 purified water.

100
